1 Assessing cats' (*Felis catus*) sensitivity to human pointing gestures

2 Margaret Mäses & Claudia A.F. Wascher\*

3

4 Behavioural Ecology Research Group, School of Life Sciences, Anglia Ruskin University, United

5 Kingdom

6

7 \*Corresponding author: Claudia A.F. Wascher: School of Life Sciences, Anglia Ruskin University, East

8 Road, Cambridge, CB1 1PT United Kingdom; Phone: +44 (0) 1223 698270;

9 e-mail: [claudia.wascher@gmail.com](mailto:claudia.wascher@gmail.com)

# Abstract

A wide range of non-human animal species have been shown to be able to respond to human referential signals, such as pointing gestures. The aim of the present study was to replicate previous findings showing cats to be sensitive to human pointing cues (Miklósi *et al.* 2005). In our study, we presented two types of human pointing gestures - momentary ipsilateral (direct pointing) and momentary cross-body pointing. We tested nine rescue cats in a two-way object choice task. On a group level, the success rate of cats was 74.4 percent. Cats performed significantly above chance level in both the ipsilateral and cross-body pointing condition. Trial number, rewarded side and type of gesture did not significantly affect the cats' performances in the experiment. On an individual level, 5 out of 7 cats who completed 20 trials, performed significantly above chance level. Two cats only completed 10 trials. One of them succeeded in 8, the other in 6 of these. The results of our study replicate previous findings of cats being responsive to human ipsilateral pointing cues and add additional knowledge about their ability to follow cross-body pointing cues. Our results highlight a domestic species, socialised in a group setting, to possess heterospecific communication skills, however we have to consider parsimonious explanations, such as local and stimulus enhancement.

**Key words:** cats, cognition, cross-body pointing, ipsilateral pointing, pointing cues, referential signals

## 32 Introduction

33 A wide range of non-human animal species have been shown to be able to respond to  
 34 human referential signals, such as pointing gestures (Krause et al., 2018; Miklósi & Soproni, 2006).  
 35 Pointing presents a species specific human communicative signal (Bard et al., 2021). The ability of  
 36 humans to understand pointing with a hand as an object-directed action develops at the age of  
 37 between 9 and 12 months (Woodward & Guajardo, 2002). The development of pointing  
 38 comprehension in humans and non-human animals is likely a result of learning, social experience  
 39 and interactions (Miklósi & Soproni, 2006). A variety of non-domesticated mammalian taxa,  
 40 including dolphins (Herman et al., 1999), elephants (Smet & Byrne, 2013), bats (Hall et al., 2011)  
 41 and sea lions (Malassis & Delfour, 2015), have demonstrated following some form of human  
 42 pointing. Several studies have examined the understanding of human pointing cues in chimpanzees  
 43 and other great apes, specifically in the object choice task, initially suggesting subjects being  
 44 relatively unsuccessful (Kirchhofer et al., 2012; Povinelli et al., 1997). However, recent studies  
 45 suggest systematic confounds rather than differences between species to cause this effect (Clark et  
 46 al., 2019; Clark & Leavens, 2019; Hopkins et al., 2013). For example the rearing environment affects  
 47 the performances of apes in pointing tasks and individuals reared in complex environments  
 48 outperformed individuals reared under standard conditions (Lyn et al., 2010; Russell et al., 2011).

49  
 50 When it comes to domestic animals, goats (Kaminski et al., 2005; Nawroth et al., 2020), pigs  
 51 (Nawroth et al., 2016), horses (Proops et al., 2010), cats (Miklósi, et al., 2005), and most  
 52 prominently – dogs (Bhattacharjee et al., 2020; Bräuer et al., 2006; Hare et al., 1998; Soproni et al.,  
 53 2002; Tauzin et al., 2015) have been shown to follow pointing signals. In the case of dogs (*Canis*  
 54 *familiaris*) in particular, the domestication process has been considered to have shaped the

evolution of their remarkable set of socio-cognitive skills that allow them to successfully communicate with humans (Hare et al., 2002). However, this hypothesis is contrasted by a range of wild canids such as wolves, coyotes, and foxes responding to human pointing gestures, as well as socialisation with humans affecting dog's performance, with pet dogs outperforming dogs housed in kennels and shelters (reviewed in: Krause et al., 2018).

Despite also being one of the most popular pets and very well adapted to human environments, cognition of domestic cats (*Felis catus*) has been studied notably less than that of dogs (Shreve & Udell, 2015). In a previous study, Miklósi, et al. (2005) demonstrated cats' abilities to follow human pointing being comparable to the abilities of dogs doing so, whereas they performed poorer compared to dogs in attention getting behaviour. In another study however, they responded to the attentional state of a person when presented with an unsolvable task (Zhang et al., 2021). Cats are also able to follow human gaze as referential signal (Pongrácz et al., 2019). Performance of cats has recently also been tested in other cognitive tasks, for example they have been shown to be able to differentiate between different quantities (Pisa & Agrillo, 2009), they are able to mentally represent non-visible objects (Takagi et al., 2021) and they imitate human action to solve a task (Fugazza et al., 2021).

Nevertheless, the body of research on socio-cognitive capacities of cats remains currently considerably small. Interestingly, it has been suggested that the process of cat domestication is different from that of other domestic species, as it was driven by a mutualistic relationship with humans and was subject to a significantly less strict artificial selection (Clutton-Brock, 1994; Serpell, 2013). Cat domestication can even be claimed to have been self-initiated (Driscoll et al., 2009). Another aspect worth taking into account is that, compared to most other species studied in the

context of social cognition, cats have an arguably less social lifestyle, as their ancestors were primarily solitary (Bradshaw, 2016). One might expect that these evolutionary peculiarities have a negative effect on cats' responsiveness to human communicative signals.

One of the measures by which referential cues can be categorized is their duration, the signal being either momentary or dynamic (Miklósi & Soproni, 2006). For momentary pointing, the signaller keeps the arm in the pointing position for only a second (Miklósi et al., 2005). On the other hand, when giving a dynamic cue, the signal is terminated after the receiver has responded (Miklósi & Soproni, 2006). The momentary cues are arguably more similar to naturally occurring communicative interactions than dynamic cues, as the subject has to remember the signal before making a choice. In the present study, we aimed to test whether cats follow the human momentary ipsilateral (direct) pointing cues in a two-way choice task, choosing the target, indicated with the referential signal, above chance level and therefore replicate the findings of Miklósi et al. (2005). Additionally, we tested whether cats follow the human momentary cross-body pointing cues in a two-way choice task. As the cross-body form of the signal was most likely novel to the subjects, we expected the cats to be more successful in following ipsilateral pointing cues. If cats show the ability to respond accurately to different forms of pointing cues this could be indicative of an ability to generalize and potentially referential understanding.

# **Methods**

## *Ethical considerations*

The present study received ethical approval from the School Research Ethics Panel of Anglia Ruskin University. The study was approved by and conducted at Pesaleidja cat shelter in the Republic of Estonia. This study complies with the national regulations on ethics and research on animals in Estonia.

## ***Standards for openness and transparency***

We report how we determined our sample size, all data exclusions, all manipulations, and all measures in the study.

## *Study subjects*

The experiment was conducted during summer 2020 (29<sup>th</sup> June - 12<sup>th</sup> August). Study subjects were housed in a rehoming centre in Tallinn, managed by Pesaleidja NGO. A total of approximately 200 cats were roaming free in different indoor spaces (10 – 51 m<sup>2</sup>; 0.5 cats per a square metre; Jaroš, 2018), nine of which participated in the study. Cats were individually tested in a separate room.

The cat's suitability to participate in the experiment was evaluated in three stages (similar to the method of Miklósi et al. (2005), with certain alterations described below). Firstly, the potential subject was approached by the experimenter (M.M.), who sat down next to the individual, and petted it for one minute. If the cat did not leave during this time or express fearful behaviour (e.g. flattened ears (Bennett et al., 2017; Deputte et al., 2021; Gourkow et al., 2014); whiskers held against face; dilated pupils; becoming immobile/freezing; piloerection; arched back; tensely

127 crouched body position; tail tucked tightly between the legs or around the body; hissing or other  
128 agonistic vocalizations (Tavernier et al., 2020)); of any kind, the experimenter guided the subject  
129 into the testing room (5.5 m<sup>2</sup>), either by allowing it to follow the experimenter or alternatively  
130 carrying it for a maximum of ten seconds. After separation the subject was given time to explore  
131 the testing room. Here the subject was isolated from its conspecifics for the duration of the  
132 experiment, the doors were closed to prevent the other cats from entering. With those individuals  
133 not initially comfortable, i.e. expressing fearful or stressed behaviour (e.g. attempting to hide  
134 (Bennett et al., 2017; Gourkow et al., 2014); yowling (Tavernier et al., 2020) and standing fixated to  
135 one of the closed doors; pacing back and forth (Gourkow et al., 2014)), with the novel setting, the  
136 experimenter sat on the floor and petted them, calmly allowing them to walk around, as well as  
137 offering some food. If the cat continued showing signs of stress after five minutes, the  
138 experimenter allowed it to exit the room and excluded it from any further testing. As a last stage of  
139 habituation, the experimenter put some food into one of the test bowls (green silicone muffin  
140 cases) and introduced it to the cat by allowing it to smell the bowl. We used small amounts of wet  
141 cat food, as recommended by the shelter staff, as a reward throughout the experiment. Rewards  
142 were given to the subjects in addition to their normal diet. The bowl was then placed on the floor,  
143 approximately one metre from the subject. The cat was allowed to approach it and eat the food. If  
144 the cat was motivated to approach the bowl and showed interest in eating the food, it passed the  
145 third stage and was included in the final experiment. This stage additionally familiarised the cats  
146 with the fact of the bowl containing a food reward. Twenty cats passed the first stage of preliminary  
147 testing, but some of them did not habituate to the novelty of testing room environment quickly  
148 enough, were not food motivated or showed a persistent side bias (description below).  
149 Consequently, ten subjects participated in the final experiment. However, we decided to exclude

one of them from data analyses due to side bias. The remaining nine subjects all completed a minimum of ten experimental trials. Seven of them completed 20 trials.

### *Study design*

As the cats' everyday diet was provided to them *ad libitum*, timing of the experiment was not dependent on the feeding regime. Before every trial and out of site of the subject, approximately the same amount of food, positioned as similarly as possible, was put into both test bowls (paying attention to prevent visual and odour-induced bias of choice). Next, a bit of food liquid was smeared onto the inner walls of a third silicone bowl, serving as 'bait' distracting the cats while the experimenter got into position. The subject was attracted to a position approximately two metres away the experimenter's final position. The experimenter simultaneously placed the test bowls in front of them, the middle line between the bowls at an approximate distance of 0.5 metres. The experimenter then made an attention-drawing sound (common utterance used for calling cats in the local area: 'ks-ks') and presented the pointing cue when the subject was looking in the direction of the experimenter.

We tested cats' responses to ipsilateral pointing to the left (IL), with the left arm and index finger pointing at the container on the left side of the experimenter, ipsilateral pointing to the right (IR), with the right arm and index finger pointing at the container on the right side of the experimenter, cross-body pointing to the left (CL), with the right arm and index finger pointing at the container on the left side of the experimenter, and cross-body pointing to the right (CR), with the left arm and index finger pointing at the container on the right side of the experimenter. The experimenter maintained a neutral body posture and gaze direction, at all times, while performing the pointing gestures. After pointing, the subject could choose one of the bowls. The cat was



considered to make a choice when it looked into the bowl or reached into it with its paw. When the choice corresponded to the direction of the gesture, the cat was allowed to eat the reward from the 'correct' bowl. When the choice was 'unsuccessful', both bowls were picked up before the subject was able to eat the food. In the case of the subject not making a choice (*e.g.*, walked between the test bowls and straight to the experimenter or walked away), the experimenter repositioned themselves and repeated the trial. In one subject, the experimenter could not lead the subject to refocus, and therefore, stopped the session and continued on another day. Order of trials in the four conditions (IL, IR, CL, CR) was pseudo-randomized. Each condition was presented five times in a total of 20 test trials. Each condition was not repeated more than twice in a row and the type or direction a maximum of three times.

If the subject continuously chose the bowl on the same side for four consecutive trials, regardless of the signal, we considered this as an indication for the subject developing a side bias. In this case, the positioning of the experiment was switched to the opposite side of the room, which seemed to be effective with four subjects. One subject, who had passed the three stages of preliminary testing but kept constantly reaching for the bowl on the right side for ten trials, was consecutively excluded from the experiment.

## *Data analyses*

Data was analysed by M.M., indicating correct, *i.e.* the cat chose the side which was pointed towards, and incorrect, *i.e.* the cat chose the side which was not pointed towards, responses. An inter-observer reliability analysis was conducted on 30 % of randomly chosen trials, which were coded by a second observer (C.A.F.W.). Inter-observer agreement was 100 %. Statistical analyses were performed in R 4.0.3 (The R Foundation for Statistical Computing, Vienna, Austria,

<http://www.r-project.org>). A generalised linear mixed model (GLMM) with a binomial distribution and logit link was used to investigate differences in performance between different conditions in the package lme4 (Bates et al., 2015). Trial outcome (successful or unsuccessful) was the response variable, the signal type (ipsilateral or cross-body pointing), location (left or right) and the trial number (1-20) were included as fixed factors, and the subject identity as a random effect. To assess multicollinearity between fixed factors, we calculated variance inflation factors (VIFs) using the vif function in the package car (Fox & Weisberg, 2011). VIFs for all factors were below 2, indicating that there was no issue with multicollinearity (Zuur et al., 2009). To describe the variance explained by our models, we provided marginal and conditional  $R^2$  values that range from 0 to 1 and described the proportion of variance explained by the fixed and by the fixed and random effects combined, respectively (Nakagawa & Schielzeth, 2013). We calculated marginal and conditional  $R^2$  values using the r.squaredGLMM function in MuMIn (version 1.15.6; Bartoń, 2019). We conducted exact, two-tailed binomial tests to investigate whether cats used pointing gestures significantly above chance. Cohen's  $h$  ( $h$ ) was calculated as a measure of effect size, using the package pwr (Champely, 2020). In individuals who completed the full 20 trials we further conducted binomial tests to see whether individuals were successful above chance level. All datasets and the R script used to conduct the statistical analyses are available as supplementary files.

## Results

On a group level, the success rate of cats was 74.4 %. Cats performed significantly above chance level in both the ipsilateral pointing (Binomial test:  $p < 0.001$ ,  $h = 1.287$ , [95% confidence intervals = 0.702 - 0.884]) and cross-body pointing condition (Binomial test:  $p = 0.002$ ,  $h = 0.823$ , [95% confidence intervals = 0.564 - 0.78]; Figure 1). Trial number (GLMM: estimate  $\pm$  standard deviation =  $-0.009 \pm 0.032$ ,  $z$ -value =  $-0.284$ ,  $p = 0.776$ ), rewarded side (GLMM: estimate  $\pm$  standard deviation =  $0.238 \pm 0.371$ ,  $z$ -value =  $0.372$ ,  $p = 0.709$ ) and type of gesture (GLMM: estimate  $\pm$  standard deviation =  $0.667 \pm 0.374$ ,  $z$ -value =  $1.78$ ,  $p = 0.074$ ) did not significantly affect the cats' performances in the experiment (intercept: GLMM: estimate  $\pm$  standard deviation =  $0.797 \pm 0.473$ ,  $z$ -value =  $1.685$ ,  $p = 0.091$ ). Overall, 2 % of the variation in performance was explained by all fixed factors together ( $R^2$  marginal), and an additional 2 % of the variation in performance was explained by the random factor (individual,  $R^2$  conditional). On an individual level, 5 out of 7 cats who completed 20 trials, performed significantly above chance level (individual 2: Binomial test:  $p = 0.011$ ,  $h = 1.287$ , [95% confidence intervals = 0.563 - 0.942], individual 3: Binomial test:  $p < 0.001$ ,  $h = 1.854$ , [95% confidence intervals = 0.683 - 0.987], individual 4: Binomial test:  $p = 0.503$ ,  $h = 0.402$ , [95% confidence intervals = 0.36 - 0.808], individual 5: Binomial test:  $p = 0.011$ ,  $h = 1.287$ , [95% confidence intervals = 0.563 - 0.942], individual 6: Binomial test:  $p = 0.041$ ,  $h = 1.047$ , [95% confidence intervals = 0.508 - 0.913], individual 7: Binomial test:  $p = 0.823$ ,  $h = 0.2$ , [95% confidence intervals = 0.315 - 0.769], individual 8: Binomial test:  $p = 0.002$ ,  $h = 1.55$ , [95% confidence intervals = 0.621 - 0.967]; Figure 2). Two cats only completed 10 trials. One of them succeeded in 8, the other in 6 of these.

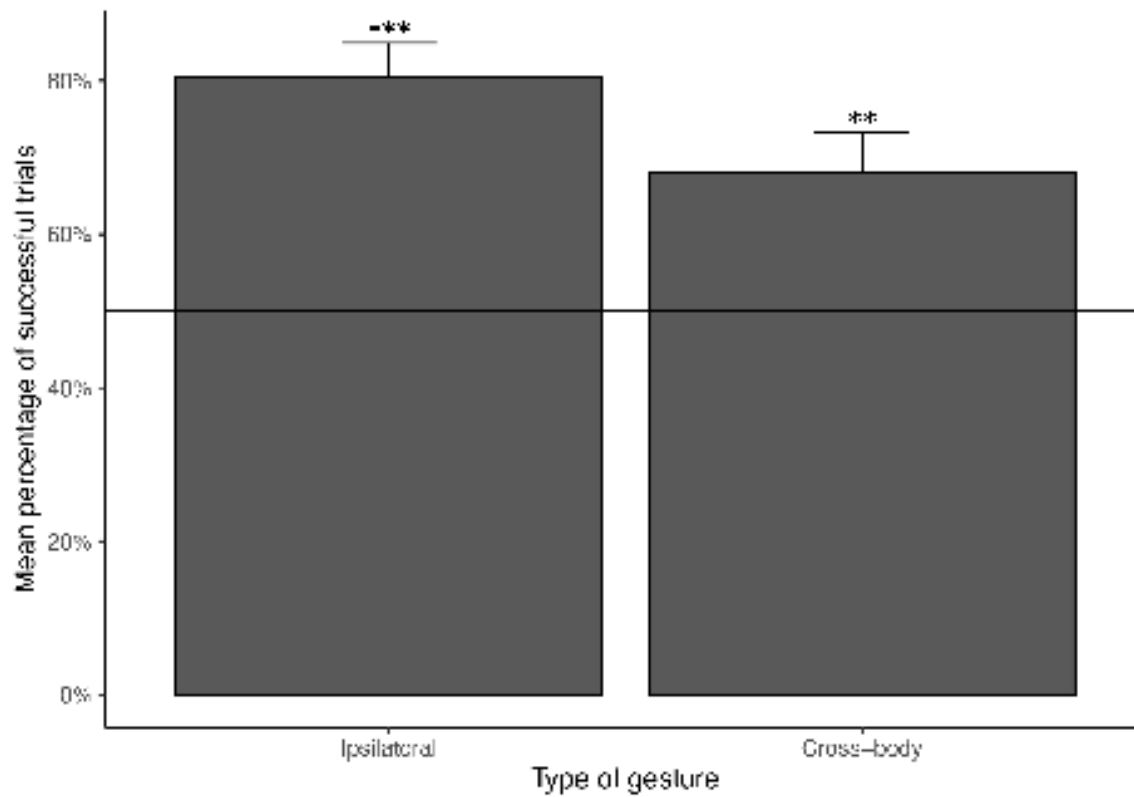

239  
 240 Figure 1. Mean percentage of trials plus standard error where the cats followed ipsilateral pointing  
 241 and cross-body pointing. Full line represents 50 % chance level. \*P < 0.05; \*\*P < 0.01; \*\*\*P < 0.001.  
 242

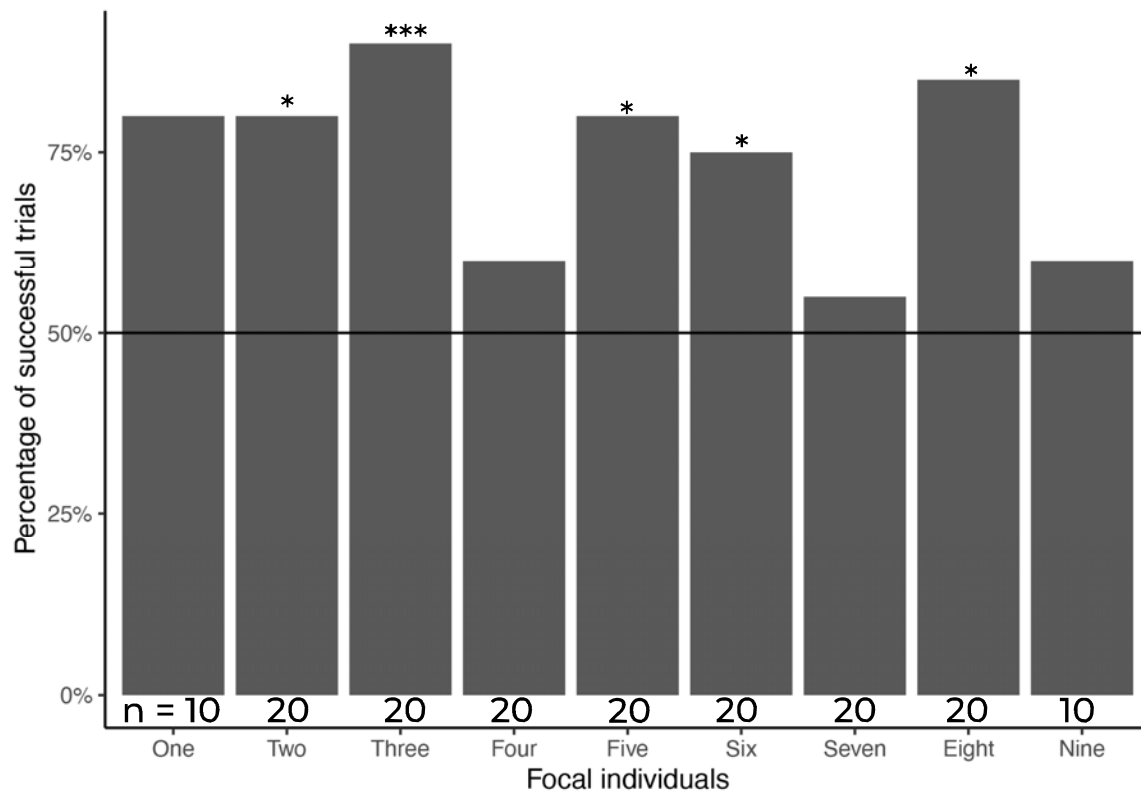

Figure 2: Percentage of successful trials for each focal individual. Sample size (n) indicates the number of trials per individual. Full line represents 50 % chance level. Binomial test: \*P < 0.05; \*\*p < 0.01; \*\*\*P < 0.001.

## Discussion

The results of the present study show cat's ability to follow human ipsilateral pointing gestures (Bard et al., 2021), which replicates findings of a previous study (Miklósi *et al.* 2005). Additionally, we show cats to be sensitive to cross-body pointing cues. We did not find a significant difference in performance between ipsilateral pointing and cross-body pointing. The ability to follow human cross-body pointing gestures has been previously shown in a wide variety of species (for a review see: Pack, 2019). Our results show that, similarly to dogs and some other species, also the more solitary living cats use communicative cues from humans. Cognitively, different mechanisms could be involved in the ability of cats to follow human communicative cues, such as stimulus or local enhancement as well as cue learning. If the subjects' choices had been influenced by rapid learning, the performance would be expected to improve over the testing trials (Kaminski et al., 2005; Malassis & Delfour, 2015; Miklósi et al., 2005). The trial number showed no significant influence on trial outcome.

From an evolutionary perspective, the finding that cats are sensitive to human pointing cues is interesting, as cats and their ancestors do not normally experience conspecifics pointing. It has previously been suggested that the process of domestication has selected for socio-cognitive abilities that enable domesticated species to better communicate with humans compared to wild species (Hare et al., 2002). In a previous study Miklósi et al. (2005) directly compared dogs and cats abilities to follow human pointing cues and attention-getting behaviour. While dogs and cats did not differ in their ability to follow human pointing cues, cats lacked some components of attention-getting behaviour compared with dogs. However, recent studies directly comparing human-socialized dogs and wolves, show the wolves to outperform dogs, in contrast to the domestication hypothesis (Range & Marshall-Pescini, 2022; Udell et al., 2008, 2010). Regarding the investigation of

the effects of domestication, it would be necessary to conduct comparable assessments of the sensitivity to human pointing gestures in socialized individuals of wildcats (*Felis lybica* and/or *Felis silvestris*; Pongrácz, Szapu & Faragó, 2019). Importantly, our study adds to a growing body of literature highlighting that also less social species are able to master socio-cognitive tasks. For example, non-social reptiles (*Geochelone carbonaria*) and fish (*Spinachia spinachia*; *Cottus gobio*; *Barbatula barbatula*; *Platichthys flesus*) have been shown to use social information (Webster & Laland, 2017; Wilkinson et al., 2010). It has been previously suggested that socialisation with humans can cause animals to acquire communicative skills which allow them to respond to cues from heterospecifics (Kaminski et al., 2005; Nawroth et al., 2020; Proops et al., 2010; Range & Marshall-Pescini, 2022), however we would like to highlight that there are more parsimonious alternative explanations, namely the cats following human pointing via local and stimulus enhancement, which in the present experiment cannot be ruled out.

Compared to similar studies with cats or dogs, where the experiments have been conducted in the owners' homes (e.g., Miklósi et al., 2005; Pongrácz et al., 2019), the standardisation of the testing environment in the current study could be considered an advantage. In a previous study, family-owned dogs outperformed kennel housed dogs in their capacity to understand human pointing gestures (D'Aniello et al., 2017; Lazarowski & Dorman, 2015). The shelter environment also means that cats have been living in a group situation for extended periods of time, which could have allowed them to acquire certain socio-cognitive skills. However, as mentioned above, cats do not use pointing cues in conspecific communication, hence any previous experience with pointing must come from human cat interactions in the shelter or before cats came to the shelter. In addition, as some other species have demonstrated following conspecific social cues (e.g., Hare & Tomasello, 1999; Kaminski et al., 2005), such ability could be investigated in cats as well. Similar to

all other studies on animal cognition and behaviour, we need to consider potential sample bias of our study population as outlined in the STRANGE framework (Webster & Rutz, 2020). We must consider the social background of focal subjects and as mentioned above, we acknowledge previous experience with conspecifics and heterospecifics (humans) in the group housed cats. Self-selection could have affected our results, as from the 200 cats in the shelter, we only tested 9 individuals who voluntarily participated in the experiment, based on being comfortable to be isolated from the group and interact with the human experimenter. Out of the seven individuals tested in 20 trials, five followed human pointing cues significantly above chance level. Future investigations into individual differences in performance and cats' abilities to follow human pointing cues would be desirable. This procedure could have selected for more bold individuals to be focal subjects in our experiment. As our focal subjects are shelter cats, we have very little information about the rearing history and past experience of the cats. However, we do know all of them to be group housed and therefore subjected to social experiences and socialisations, as well as experience with human caregivers. Regarding acclimatisation and habituation, we only tested subjects who acclimatised well to the experimental setup and passed habituation. We had to exclude one individual who would not pass the habituation stages and it can very well be that this procedure excluded focal subjects who are less responsive to human pointing cues. Our experiment was of a short-term nature, capturing the cats' responses during a short-term period over summer. We did not intend to investigate potential natural changes in responsiveness, *e.g.*, seasonal changes, ontogenetic effects, and these areas should be considered for future studies. We also have no information about the genetic make-up of our focal subjects.

To conclude, the results of our study replicate previous findings of cats being responsive to human ipsilateral pointing cues and add additional knowledge about their ability to follow cross-



body pointing cues. Our results highlight a domestic species, socialised in a group setting, to possess communicative skills with heterospecific, however we have to consider parsimonious explanations such as local and stimulus enhancement.

## **Acknowledgements**

We thank Johanna Miedel, the manager of Pesaleidja, for granting permission to work with the cats. We would also like to thank the rest of the team of staff and volunteers at Pesaleidja shelter for their guidance and cooperation on site. We also thank two anonymous reviewers for their comments, which greatly improved the article.

## **Conflict of interest**

The authors declare no conflict in interest

## **Author contributions**

Conceptualization: MM and CAFW; Methodology: MM and CAFW; Investigation: MM; Formal analysis: MM and CAFW; Supervision: CAFW; Writing: MM and CAFW.

# References

- Bard, K. A., Keller, H., Ross, K. M., Hewlett, B., Butler, L., Boysen, S. T., & Matsuzawa, T. (2021). Joint attention in human and chimpanzee infants in varied socioecological contexts. *Monographs of the Society for Research in Child Development*, 86(4), 7–217.
- Bartoń, K. (2019). *MuMIn: Multi-Model Inference*. (1.43.6). <https://CRAN.R-project.org/package=MuMIn>
- Bates, D., Mächler, M., Bolker, B., & Walker, S. (2015). Fitting linear mixed-effects models using lme4. *Journal of Statistical Software*, 67(1), 1–48.
- Bennett, V., Gourkow, N., & Mills, D. S. (2017). Facial correlates of emotional behaviour in the domestic cat (*Felis catus*). *Behavioural Processes*, 141, 342–350. <https://doi.org/10.1016/j.beproc.2017.03.011>
- Bhattacharjee, D., Mandal, S., Shit, P., Varghese, M. G., Vishnoi, A., & Bhadra, A. (2020). Free-ranging dogs are capable of utilizing complex human pointing cues. *Frontiers in Psychology*, 10, 2818. <https://doi.org/10.3389/fpsyg.2019.02818>
- Bradshaw, J. W. S. (2016). Sociality in cats: A comparative review. *Journal of Veterinary Behavior*, 11, 113–124. <https://doi.org/10.1016/j.jveb.2015.09.004>
- Bräuer, J., Kaminski, J., Riedel, J., Call, J., & Tomasello, M. (2006). Making inferences about the location of hidden food: Social dog, causal ape. *Journal of Comparative Psychology*, 120(1), 38.
- Champely, S. (2020). *pwr: Basic Functions for Power Analysis*. (R package version 1.3-0). <https://CRAN.R-project.org/package=pwr>
- Clark, H., Elsherif, M. M., & Leavens, D. A. (2019). Ontogeny vs. phylogeny in primate/canid comparisons: A meta-analysis of the object choice task. *Neuroscience & Biobehavioral Reviews*, 105, 178–189. <https://doi.org/10.1016/j.neubiorev.2019.06.001>

370 Clark, H., & Leavens, D. A. (2019). Testing dogs in ape-like conditions: The effect of a barrier on  
371 dogs' performance on the object-choice task. *Animal Cognition*, 22, 1063–1072.

372 Clutton-Brock, J. (1994). The unnatural world: Behavioural aspects of humans and animals in the  
373 process of domestication. In *Animals and Human Society: Changing Perspectives* (pp. 35–  
374 47). Routledge.

375 D'Aniello, B., Alterisio, A., Scandurra, A., Petremolo, E., Iommelli, M. R., & Aria, M. (2017).  
376 What's the point? Golden and Labrador retrievers living in kennels do not understand human  
377 pointing gestures. *Animal Cognition*, 20(4), 777–787. [https://doi.org/10.1007/s10071-017-](https://doi.org/10.1007/s10071-017-1098-2)  
378 1098-2

379 Deputte, B. L., Jumelet, E., Gilbert, C., & Titeux, E. (2021). Heads and tails: An analysis of visual  
380 signals in cats, *Felis catus*. *Animals*, 11(9), 2752. <https://doi.org/10.3390/ani11092752>

381 Driscoll, C. A., Macdonald, D. W., & O'Brien, S. J. (2009). From wild animals to domestic pets, an  
382 evolutionary view of domestication. *Proceedings of the National Academy of Sciences*,  
383 106(Supplement\_1), 9971–9978. <https://doi.org/10.1073/pnas.0901586106>

384 Fox, J., & Weisberg, S. (2011). *An {R} Companion to Applied Regression*. (second). Sage  
385 Publications.

386 Fugazza, C., Sommesse, A., Pogány, Á., & Miklósi, Á. (2021). Did we find a copycat? Do as I Do in  
387 a domestic cat (*Felis catus*). *Animal Cognition*, 24(1), 121–131.  
388 <https://doi.org/10.1007/s10071-020-01428-6>

389 Gourkow, N., LaVoy, A., Dean, G. A., & Phillips, C. J. C. (2014). Associations of behaviour with  
390 secretory immunoglobulin A and cortisol in domestic cats during their first week in an animal  
391 shelter. *Applied Animal Behaviour Science*, 150, 55–64.  
392 <https://doi.org/10.1016/j.applanim.2013.11.006>

393 Hall, N. J., Udell, M. A. R., Dorey, N. R., Walsh, A. L., & Wynne, C. D. L. (2011). Megachiropteran  
394 bats (pteropus) utilize human referential stimuli to locate hidden food. *Journal of*  
395 *Comparative Psychology*, 125(3), 341–346. <https://doi.org/10.1037/a0023680>

396 Hare, B., Brown, M., Williamson, C., & Tomasello, M. (2002). The domestication of social  
397 cognition in dogs. *Science*, 298(5598), 1634–1636. <https://doi.org/10.1126/science.1072702>

398 Hare, B., Call, J., & Tomasello, M. (1998). Communication of food location between human and dog  
399 (*Canis familiaris*). *Evolution of Communication*, 2(1), 137–159.

400 Hare, B., & Tomasello, M. (1999). Domestic dogs (*Canis familiaris*) use human and conspecific  
401 social cues to locate hidden food. *Journal of Comparative Psychology*, 113(2), 173–177.

402 Herman, L. M., Abichandani, S. L., Elhajj, A. N., Herman, E. Y. K., & Sanchez, J. L. (1999).  
403 Dolphins (*Tursiops truncatus*) comprehend the referential character of the human pointing  
404 gesture. *Journal of Comparative Psychology*, 113(4), 347.

405 Hopkins, W. D., Russell, J., McIntyre, J., & Leavens, D. A. (2013). Are chimpanzees really so poor  
406 at understanding imperative pointing? Some new data and an alternative view of canine and  
407 ape social cognition. *PLoS ONE*, 8(11), e79338.  
408 <https://doi.org/10.1371/journal.pone.0079338>

409 Jaroš, F. (2018). Cat cultures and threefold modelling of human-animal interactions: On the example  
410 of Estonian cat shelters. *Biosemiotics*, 11(3), 365–386. [https://doi.org/10.1007/s12304-018-](https://doi.org/10.1007/s12304-018-9332-0)  
411 9332-0

412 Kaminski, J., Riedel, J., Call, J., & Tomasello, M. (2005). Domestic goats, *Capra hircus*, follow gaze  
413 direction and use social cues in an object choice task. *Animal Behaviour*, 69(1), 11–18.  
414 <https://doi.org/10.1016/j.anbehav.2004.05.008>

415 Kirchhofer, K. C., Zimmermann, F., Kaminski, J., & Tomasello, M. (2012). Dogs (*Canis familiaris*),  
416 but not chimpanzees (*Pan troglodytes*), understand imperative pointing. *PLoS ONE*, 7(2),  
417 e30913. <https://doi.org/10.1371/journal.pone.0030913>

418 Krause, M. A., Udell, M. A. R., Leavens, D. A., & Skopos, L. (2018). Animal pointing: Changing  
419 trends and findings from 30 years of research. *Journal of Comparative Psychology*, 132(3),  
420 326–345. <https://doi.org/10.1037/com0000125>

421 Lazarowski, L., & Dorman, D. C. (2015). A comparison of pet and purpose-bred research dog (*Canis*  
422 *familiaris*) performance on human-guided object-choice tasks. *Behavioural Processes*, 110,  
423 60–67. <https://doi.org/10.1016/j.beproc.2014.09.021>

424 Lyn, H., Russell, J. L., & Hopkins, W. D. (2010). The impact of environment on the comprehension  
425 of declarative communication in apes. *Psychological Science*, 21(3), 360–365.  
426 <https://doi.org/10.1177/0956797610362218>

427 Malassis, R., & Delfour, F. (2015). Sea lions' (*Zalophus californianus*) use of human pointing  
428 gestures as referential cues. *Learning & Behavior*, 43(2), 101–112.  
429 <https://doi.org/10.3758/s13420-014-0165-7>

430 Miklósi, Á., Pongrácz, P., Lakatos, G., Topál, J., & Csányi, V. (2005). A comparative study of the  
431 use of visual communicative signals in interactions between dogs (*Canis familiaris*) and  
432 humans and cats (*Felis catus*) and humans. *Journal of Comparative Psychology*, 119(2), 179.

433 Miklósi, Á., & Soproni, K. (2006). A comparative analysis of animals' understanding of the human  
434 pointing gesture. *Animal Cognition*, 9(2), 81–93. <https://doi.org/10.1007/s10071-005-0008-1>

435 Nakagawa, S., & Schielzeth, H. (2013). A general and simple method for obtaining R<sup>2</sup> from  
436 generalized linear mixed-effects models. *Methods in Ecology and Evolution*, 4(2), 133–142.  
437 <https://doi.org/10.1111/j.2041-210x.2012.00261.x>

438 Nawroth, C., Ebersbach, M., & Borell, E. V. (2016). Are domestic pigs (*Sus scrofa domestica*) able  
439 to use complex human-given cues to find a hidden reward? *Animal Welfare*, 25(2), 185–190.  
440 <https://doi.org/10.7120/09627286.25.2.185>

441 Nawroth, C., Martin, Z. M., & McElligott, A. G. (2020). Goats follow human pointing gestures in an  
 442 object choice task. *Frontiers in Psychology, 11*, 915.  
 443 <https://doi.org/10.3389/fpsyg.2020.00915>

444 Pack, A. A. (2019). Pointing. In J. Vonk & T. Shackelford (Eds.), *Encyclopedia of Animal Cognition*  
 445 *and Behavior* (pp. 1–19). Springer International Publishing. <https://doi.org/10.1007/978-3->  
 446 [319-47829-6\\_753-1](https://doi.org/10.1007/978-3-319-47829-6_753-1)

447 Pisa, P. E., & Agrillo, C. (2009). Quantity discrimination in felines: A preliminary investigation of  
 448 the domestic cat (*Felis silvestris catus*). *Journal of Ethology, 27*(2), 289–293.  
 449 <https://doi.org/10.1007/s10164-008-0121-0>

450 Pongrácz, P., Szapu, J. S., & Faragó, T. (2019). Cats (*Felis silvestris catus*) read human gaze for  
 451 referential information. *Intelligence, 74*, 43–52. <https://doi.org/10.1016/j.intell.2018.11.001>

452 Povinelli, D. J., Reaux, J. E., Bierschwale, D. T., Allain, A. D., & Simon, B. B. (1997). Exploitation  
 453 of pointing as a referential gesture in young children, but not adolescent chimpanzees.  
 454 *Cognitive Development, 12*(4), 423–461. [https://doi.org/10.1016/S0885-2014\(97\)90017-4](https://doi.org/10.1016/S0885-2014(97)90017-4)

455 Proops, L., Walton, M., & McComb, K. (2010). The use of human-given cues by domestic horses,  
 456 *Equus caballus*, during an object choice task. *Animal Behaviour, 79*(6), 1205–1209.  
 457 <https://doi.org/10.1016/j.anbehav.2010.02.015>

458 Range, F., & Marshall-Pescini, S. (2022). Comparing wolves and dogs: Current status and  
 459 implications for human ‘self-domestication.’ *Trends in Cognitive Sciences,*  
 460 [S1364661322000183. https://doi.org/10.1016/j.tics.2022.01.003](https://doi.org/10.1016/j.tics.2022.01.003)

461 Russell, J. L., Lyn, H., Schaeffer, J. A., & Hopkins, W. D. (2011). The role of socio-communicative  
 462 rearing environments in the development of social and physical cognition in apes:  
 463 Development of social and physical cognition in apes. *Developmental Science, 14*(6), 1459–  
 464 1470. <https://doi.org/10.1111/j.1467-7687.2011.01090.x>

- 465 Serpell, J. A. (2013). Domestication and history of the cat. In D. C. Turner & P. Bateson (Eds.), *The*  
466 *Domestic Cat* (3rd ed., pp. 83–100). Cambridge University Press.  
467 <https://doi.org/10.1017/CBO9781139177177.011>
- 468 Shreve, K. R., & Udell, M. A. R. (2015). What’s inside your cat’s head? A review of cat (*Felis*  
469 *silvestris catus*) cognition research past, present and future. *Animal Cognition*, 18(6), 1195–  
470 1206. <https://doi.org/10.1007/s10071-015-0897-6>
- 471 Smet, A. F., & Byrne, R. W. (2013). African elephants can use human pointing cues to find hidden  
472 food. *Current Biology*, 23(20), 2033–2037. <https://doi.org/10.1016/j.cub.2013.08.037>
- 473 Soproni, K., Miklósi, Á., Topál, J., & Csányi, V. (2002). Dogs’ (*Canis familiaris*) responsiveness to  
474 human pointing gestures. *Journal of Comparative Psychology*, 116(1), 27–34.  
475 <https://doi.org/10.1037/0735-7036.116.1.27>
- 476 Takagi, S., Chijiwa, H., Arahori, M., Saito, A., Fujita, K., & Kuroshima, H. (2021). Socio-spatial  
477 cognition in cats: Mentally mapping owner’s location from voice. *PLOS ONE*, 16(11),  
478 e0257611. <https://doi.org/10.1371/journal.pone.0257611>
- 479 Tauzin, T., Csík, A., Kis, A., Kovács, K., & Topál, J. (2015). The order of ostensive and referential  
480 signals affects dogs’ responsiveness when interacting with a human. *Animal Cognition*, 18(4),  
481 975–979. <https://doi.org/10.1007/s10071-015-0857-1>
- 482 Tavernier, C., Ahmed, S., Houpt, K. A., & Yeon, S. C. (2020). Feline vocal communication. *Journal*  
483 *of Veterinary Science*, 21(1), e18. <https://doi.org/10.4142/jvs.2020.21.e18>
- 484 Udell, M. A. R., Dorey, N. R., & Wynne, C. D. L. (2008). Wolves outperform dogs in following  
485 human social cues. *Animal Behaviour*, 76(6), 1767–1773.  
486 <https://doi.org/10.1016/j.anbehav.2008.07.028>
- 487 Udell, M. A. R., Dorey, N. R., & Wynne, C. D. L. (2010). What did domestication do to dogs? A  
488 new account of dogs’ sensitivity to human actions. *Biological Reviews*, 85(2), 327–345.  
489 <https://doi.org/10.1111/j.1469-185X.2009.00104.x>

490 Webster, M. M., & Laland, K. N. (2017). Social information use and social learning in non-grouping  
491 fishes. *Behavioral Ecology*, 28(6), 1547–1552. <https://doi.org/10.1093/beheco/arx121>

492 Webster, M. M., & Rutz, C. (2020). How STRANGE are your study animals? *Nature*, 582(7812),  
493 337–340. <https://doi.org/10.1038/d41586-020-01751-5>

494 Wilkinson, A., Kuenstner, K., Mueller, J., & Huber, L. (2010). Social learning in a non-social reptile  
495 (*Geochelone carbonaria*). *Biology Letters*, 6(5), 614–616.  
496 <https://doi.org/10.1098/rsbl.2010.0092>

497 Woodward, A. L., & Guajardo, J. J. (2002). Infants’ understanding of the point gesture as an object-  
498 directed action. *Cognitive Development*, 17(1), 1061–1084. [https://doi.org/10.1016/S0885-](https://doi.org/10.1016/S0885-2014(02)00074-6)  
499 [2014\(02\)00074-6](https://doi.org/10.1016/S0885-2014(02)00074-6)

500 Zhang, L., Needham, K. B., Juma, S., Si, X., & Martin, F. (2021). Feline communication strategies  
501 when presented with an unsolvable task: The attentional state of the person matters. *Animal*  
502 *Cognition*, 24(5), 1109–1119. <https://doi.org/10.1007/s10071-021-01503-6>

503 Zuur, A. F., Ieno, E. N., Walker, N. J., Saveliev, A. A., & Smith, G. M. (2009). *Mixed Effects Models*  
504 *and Extension in Ecology With R*. Springer.

505
